# Supplementary material
Source: Springer Nature journal article supplement (https://www.springermedizin.de/resource/supplementary/12889_2012_5712_MOESM1_ESM.pdf/9496042)
Supplement: MOESM1 [file 9496042]

### Phase 1: Research Question 1

Exploring ethnically specific channels on reach

#### 13 Ethnically specific Recruitment Channels

- 2 Ghanaian churches (women's movements)
- 2 Ghanaian women's organizations
- 2 Surinamese women's organizations
- 2 Surinamese-elderly women's organizations
- 1 Surinamese radio program
- 1 Surinamese radio spot
- 1 Caribbean-Surinamese radio program
- 1 Antillean radio program
- 1 Antillean church

#### Reach

Reply cards  
(main source)  
Observations  
Interviews key figures\*

#### Explanations for Reach

Observations, Interviews mothers\*,  
Interviews key figures\*

### Phase 2: Research Question 2

Exploring ethnically matched versus Dutch recruiters on reach and participation

#### MATCHED CHANNELS

##### 7 Channels – Intervention group

- 1a: Ghanaian church
- 2a: Ghanaian women's organization
- 3a: Surinamese women's organization
- 4a: Surinamese-elderly women's organization
- 5a: Surinamese radio spot
- 6a: Antillean radio program
- 7a: Antillean church

##### 6 Channels – Comparison group

- 1b: Ghanaian church
- 2b: Ghanaian women's organization
- 3b: Surinamese women's organization
- 4b: Surinamese-elderly women's organization
- 5b: Surinamese radio program
- 6b: Caribbean radio program

##### +2 Comparison Channels (General)

- 7b: Community project
- 7c: Immigrant organization (via school)

#### Intervention

Ethnically Matched Recruiters:  
*Key figures within organizations*

#### Comparison

Dutch Recruiters:  
*Dutch Health Educators*

#### Receptivity

Observations  
Interviews mothers\*  
Interviews key figures\*

#### Participation

Registration records

#### Explanations for Receptivity and Participation

Observations, Interviews mothers\*,  
Interviews key figures\*
